# Supplementary material for: Impacts of COVID-19 on Stress in Middle School Teachers and Staff in Minnesota: An Exploratory Study Using Random Forest Analysis
Source: MDPI journal article supplement (doi:10.3390/ijerph20176698), 2023-09-01
Supplement: s1 [file s1]

**Table S1: Epidemic Pandemic Impacts Inventory (EPII) Responses**

| <b>EPII Item</b>                                                                                                                       | <b>Yes (%)*</b> | <b>No (%)</b> |
|----------------------------------------------------------------------------------------------------------------------------------------|-----------------|---------------|
| <b>Work and Employment</b>                                                                                                             |                 |               |
| Work1: Laid off from job or had to close own business.                                                                                 | 39 (13.2%)      | 256 (86.8%)   |
| Work2: Reduce work hours or furloughed.                                                                                                | 80 (27.0%)      | 216 (73.0%)   |
| Work3: Had to lay-off or furlough employees or people supervised.                                                                      | 15 (5.1%)       | 280 (94.9%)   |
| Work4: Had to continue to work even though in close contact with people who might be infected (e.g., customers, patients, co-workers). | 107 (36.4%)     | 187 (63.6%)   |
| Work5: Spend a lot of time disinfecting at home due to close contact with people who might be infected at work.                        | 97 (32.9%)      | 198 (67.1%)   |
| Work6: Increased in workload or work responsibilities.                                                                                 | 157 (53.4%)     | 137 (46.6%)   |
| Work7: Hard time doing job well because of needing to take care of people in the home.                                                 | 102 (34.6%)     | 193 (65.4%)   |
| Work8: Hard time making transition to working from home.                                                                               | 161 (55.3%)     | 130 (44.7%)   |
| Work9: Provided direct care to people with the disease (e.g., doctor, nurse, patient case assistant, radiologist).                     | 11 (3.7%)       | 284 (96.3%)   |
| Work10: Provided supportive care to people with the disease (e.g., medical support staff, custodial, administration).                  | 17 (5.8%)       | 277 (94.2%)   |
| Work11: Provided care to people who died as a result of the disease.                                                                   | 6 (2.0%)        | 287 (98.0%)   |
| <b>Education and Training</b>                                                                                                          |                 |               |
| Edu1: Had a child in home who could not go to school.                                                                                  | 147 (49.8%)     | 148 (50.2%)   |
| Edu2: Adult unable to go to school or training for weeks or had to withdraw.                                                           | 38 (13.2%)      | 249 (86.8%)   |
| <b>Home Life</b>                                                                                                                       |                 |               |
| Home1: Childcare or babysitting unavailable when needed.                                                                               | 54 (18.2%)      | 242 (81.8%)   |
| Home2: Difficulty taking care of children in the home.                                                                                 | 68 (23.1%)      | 227 (76.9%)   |
| Home3: More conflict with child or harsher in disciplining child or children.                                                          | 58 (19.6%)      | 238 (80.4%)   |
| Home4: Had to take over teaching or instructing child.                                                                                 | 117 (39.8%)     | 177 (60.2%)   |
| Home5: Family or friends had to move into your home.                                                                                   | 20 (6.8%)       | 275 (93.2%)   |
| Home6: Had to spend a lot more time taking care of a family member.                                                                    | 84 (28.5%)      | 211 (71.5%)   |
| Home7: Had to move or relocate.                                                                                                        | 12 (4.1%)       | 284 (95.9%)   |
| Home8: Became homeless.                                                                                                                | 1 (0.3%)        | 295 (99.7%)   |
| Home9: Increase in verbal arguments or conflict with a partner or spouse.                                                              | 70 (23.6%)      | 226 (76.4%)   |
| Home10: Increase in physical conflict with a partner or spouse.                                                                        | 1 (0.3%)        | 295 (99.7%)   |
| Home11: Increase in verbal arguments or conflict with other adult(s) in home.                                                          | 22 (7.4%)       | 274 (92.6%)   |
| Home12: Increase in physical conflict with other adult(s) in home.                                                                     | 2 (0.7%)        | 292 (99.3%)   |
| Home13: Increase in physical conflict among children in home.                                                                          | 10 (3.4%)       | 286 (96.6%)   |
| <b>Social Activities</b>                                                                                                               |                 |               |
| Soc1: Separated from family or close friends.                                                                                          | 254 (86.1%)     | 41 (13.9%)    |
| Soc2: Did not have the ability or resources to talk to family or friends while separated.                                              | 20 (6.8%)       | 275 (93.2%)   |

|                                                                                                             |             |             |
|-------------------------------------------------------------------------------------------------------------|-------------|-------------|
| Soc3: Unable to visit loved one in a care facility (e.g., nursing home, group home).                        | 97 (32.8%)  | 199 (67.2%) |
| Soc4: Family celebrations cancelled or restricted.                                                          | 278 (93.9%) | 18 (6.1%)   |
| Soc5: Planned travel or vacations cancelled.                                                                | 247 (83.7%) | 48 (16.3%)  |
| Soc6: Religious or spiritual activities cancelled or restricted.                                            | 194 (65.8%) | 101 (34.2%) |
| Soc7: Unable to be with a close family member in critical condition.                                        | 65 (22.0%)  | 230 (78.0%) |
| Soc8: Unable to attend in-person funeral or religious services for a family member or friend who died.      | 90 (30.5%)  | 205 (69.5%) |
| Soc9: Unable to participate in social clubs, sports teams, or usual volunteer activities.                   | 235 (79.4%) | 61 (20.6%)  |
| Soc10: Unable to do enjoyable activities or hobbies.                                                        | 238 (81.2%) | 55 (18.8%)  |
| <b>Economic</b>                                                                                             |             |             |
| Economic1: Unable to get enough food or healthy food.                                                       | 7 (2.4%)    | 288 (97.6%) |
| Economic2: Unable to access clean water.                                                                    | 1 (0.3%)    | 294 (99.7%) |
| Economic3: Unable to pay important bills like rent or utilities.                                            | 8 (2.7%)    | 287 (97.3%) |
| Economic4: Difficult getting places due to less access to public transportation or concerns about safety.   | 15 (5.1%)   | 281 (94.9%) |
| Economic5: Unable to get needed medications (e.g., prescriptions or over-the-counter).                      | 11 (3.7%)   | 284 (96.3%) |
| <b>Emotional Health and Well-Being</b>                                                                      |             |             |
| Mental1: Increase in child behavioral or emotional problems                                                 | 81 (27.4%)  | 215 (72.6%) |
| Mental2: Increase in child's sleep difficulties or nightmares.                                              | 58 (19.6%)  | 238 (80.7%) |
| Mental3: Increase in mental health problems or symptoms (e.g., mood, anxiety, stress)                       | 172 (58.3%) | 123 (41.7%) |
| Mental4: Increase in sleep problems or poor sleep quality.                                                  | 164 (55.4%) | 132 (44.6%) |
| Mental5: Increase in use of alcohol or substances.                                                          | 84 (28.4%)  | 212 (71.6%) |
| Mental6: Unable to access mental health treatment or therapy.                                               | 24 (8.1%)   | 272 (91.9%) |
| Mental7: Not satisfied with changes in mental health treatment or therapy.                                  | 11 (3.7%)   | 283 (96.3%) |
| Mental8: Spent more time on screens and devices (e.g., looking at phone, playing video games, watching TV). | 268 (90.5%) | 28 (9.5%)   |
| <b>Physical Health Problems</b>                                                                             |             |             |
| Phy1: Increase in health problems not related to this disease.                                              | 43 (14.5%)  | 253 (85.5%) |
| Phy2: Less physical activity or exercise.                                                                   | 179 (60.5%) | 117 (39.5%) |
| Phy3: Overeating or eating more unhealth foods (e.g., junk food).                                           | 181 (61.6%) | 113 (38.4%) |
| Phy4: More time sitting down or being sedentary.                                                            | 261 (88.5%) | 34 (11.5%)  |
| Phy5: Important medical procedure cancelled (e.g., surgery).                                                | 30 (10.2%)  | 265 (89.2%) |
| Phy6: Unable to access medical care for a serious condition (e.g., dialysis, chemotherapy).                 | 5 (1.7%)    | 290 (98.3%) |
| Phy7: Got less medical care than usual (e.g., routine or preventative care appointments).                   | 127 (42.9%) | 169 (57.1%) |
| Phy8: Elderly or disabled family member not in home unable to get the help they need.                       | 19 (6.5%)   | 274 (93.5%) |
| <b>Physical Distancing and Quarantine</b>                                                                   |             |             |
| Dist1: Isolated or quarantined due to possible exposure to this disease.                                    | 83 (28.0%)  | 213 (72.0%) |

|                                                                                                                |             |             |
|----------------------------------------------------------------------------------------------------------------|-------------|-------------|
| Dist2: Isolated or quarantined due to symptoms of this disease.                                                | 19 (6.4%)   | 276 (93.6%) |
| Dist3: Isolated due to existing health conditions that increase risk of infection or disease.                  | 81 (27.6%)  | 213 (72.4%) |
| Dist4: Limited physical closeness with child or loved one due to concerns of infection.                        | 102 (34.5%) | 194 (65.6%) |
| Dist5: Moved out or lived away from family due to a high-risk job (e.g., health care worker, first responder). | 3 (1.0%)    | 293 (99.0%) |
| Dist6: Close family member not in the home was quarantined.                                                    | 42 (14.2%)  | 254 (85.8%) |
| Dist7: Family member was unable to return home due to quarantine or travel restrictions.                       | 18 (6.1%)   | 277 (93.9%) |
| Dist8: Entire household was quarantined for a week or longer.                                                  | 37 (12.5%)  | 258 (87.5%) |

### **Infection History**

|                                                                         |            |             |
|-------------------------------------------------------------------------|------------|-------------|
| Inf1: Currently have symptoms of this disease but have not been tested. | 2 (0.7%)   | 294 (99.3%) |
| Inf2: Tested and currently have this disease.                           | 2 (0.7%)   | 294 (99.3%) |
| Inf3: Had symptoms of this disease but never tested.                    | 31 (10.5%) | 265 (89.5%) |
| Inf4: Tested positive for this disease but no longer have it.           | 1 (0.3%)   | 295 (99.7%) |
| Inf5: Got medical treatment due to severe symptoms of this disease.     | 1 (0.3%)   | 295 (99.7%) |
| Inf6: Hospital stay due to this disease.                                | 0          | 296 (100%)  |
| Inf7: Someone died of this disease while in our home.                   | 0          | 295 (100%)  |
| Inf8: Death of a close friend or family member from this disease.       | 18 (6.1%)  | 278 (93.9%) |

### **Positive Change**

|                                                                                                                                                           |             |             |
|-----------------------------------------------------------------------------------------------------------------------------------------------------------|-------------|-------------|
| Pos1: More quality time with family or friends in person or from a distance (e.g., on the phone, Email, social media, video conferencing, online gaming). | 236 (79.7%) | 60 (20.3%)  |
| Pos2: More quality time with partner or spouse.                                                                                                           | 205 (70.7%) | 85 (29.3%)  |
| Pos3: More quality time with children.                                                                                                                    | 191 (67.5%) | 92 (32.5%)  |
| Pos4: Improved relationship with family or friends.                                                                                                       | 154 (52.7%) | 138 (47.3%) |
| Pos5: New connections made with supportive people.                                                                                                        | 90 (30.5%)  | 205 (69.5%) |
| Pos6: Increase in exercise or physical activity.                                                                                                          | 117 (40.1%) | 175 (59.9%) |
| Pos7: More time in nature or being outdoors.                                                                                                              | 229 (77.4%) | 67 (22.6%)  |
| Pos8: More time doing enjoyable activities (e.g., reading books, puzzles).                                                                                | 208 (70.7%) | 86 (29.3%)  |
| Pos9: Developed new hobbies or activities.                                                                                                                | 119 (40.5%) | 175 (59.5%) |
| Pos10: More appreciative of things usually taken for granted.                                                                                             | 249 (84.1%) | 47 (15.9%)  |
| Pos11: Paid more attention to personal health.                                                                                                            | 166 (56.1%) | 130 (43.9%) |
| Pos12: Paid more attention to preventing physical injuries.                                                                                               | 92 (31.3%)  | 202 (68.7%) |
| Pos13: Ate healthier foods.                                                                                                                               | 116 (39.5%) | 178 (60.5%) |
| Pos14: Less use of alcohol or substances.                                                                                                                 | 38 (13.3%)  | 247 (86.7%) |
| Pos15: Spent less time on screens or devices outside of work hours (e.g., looking at phone, playing video games, watching TV).                            | 26 (8.9%)   | 267 (91.1%) |
| Pos16: Volunteered time to help people in need.                                                                                                           | 70 (24.0%)  | 222 (76.0%) |
| Pos17: Donated time or goods to cause related to this disease (e.g., made masks, donated blood, volunteered).                                             | 110 (37.3%) | 185 (62.7%) |
| Pos18: Found greater meaning in work, employment, or school.                                                                                              | 117 (39.5%) | 179 (60.5%) |
| Pos19: More efficient or productive in work, employment, or school.                                                                                       | 105 (36.0%) | 187 (64.0%) |

\*Numbers may not sum to 296 due to missing data
